# Supplementary material for: Transcriptome Analysis to Identify Cold-Responsive Genes in Amur Carp (Cyprinus carpio haematopterus)
Source: PubMed Central journal article supplement (PMC4476670; doi:10.1371/journal.pone.0130526), 2015-06-22

S1 File. Expression levels of fourteen selected genes in three tissues as determined by qPCR

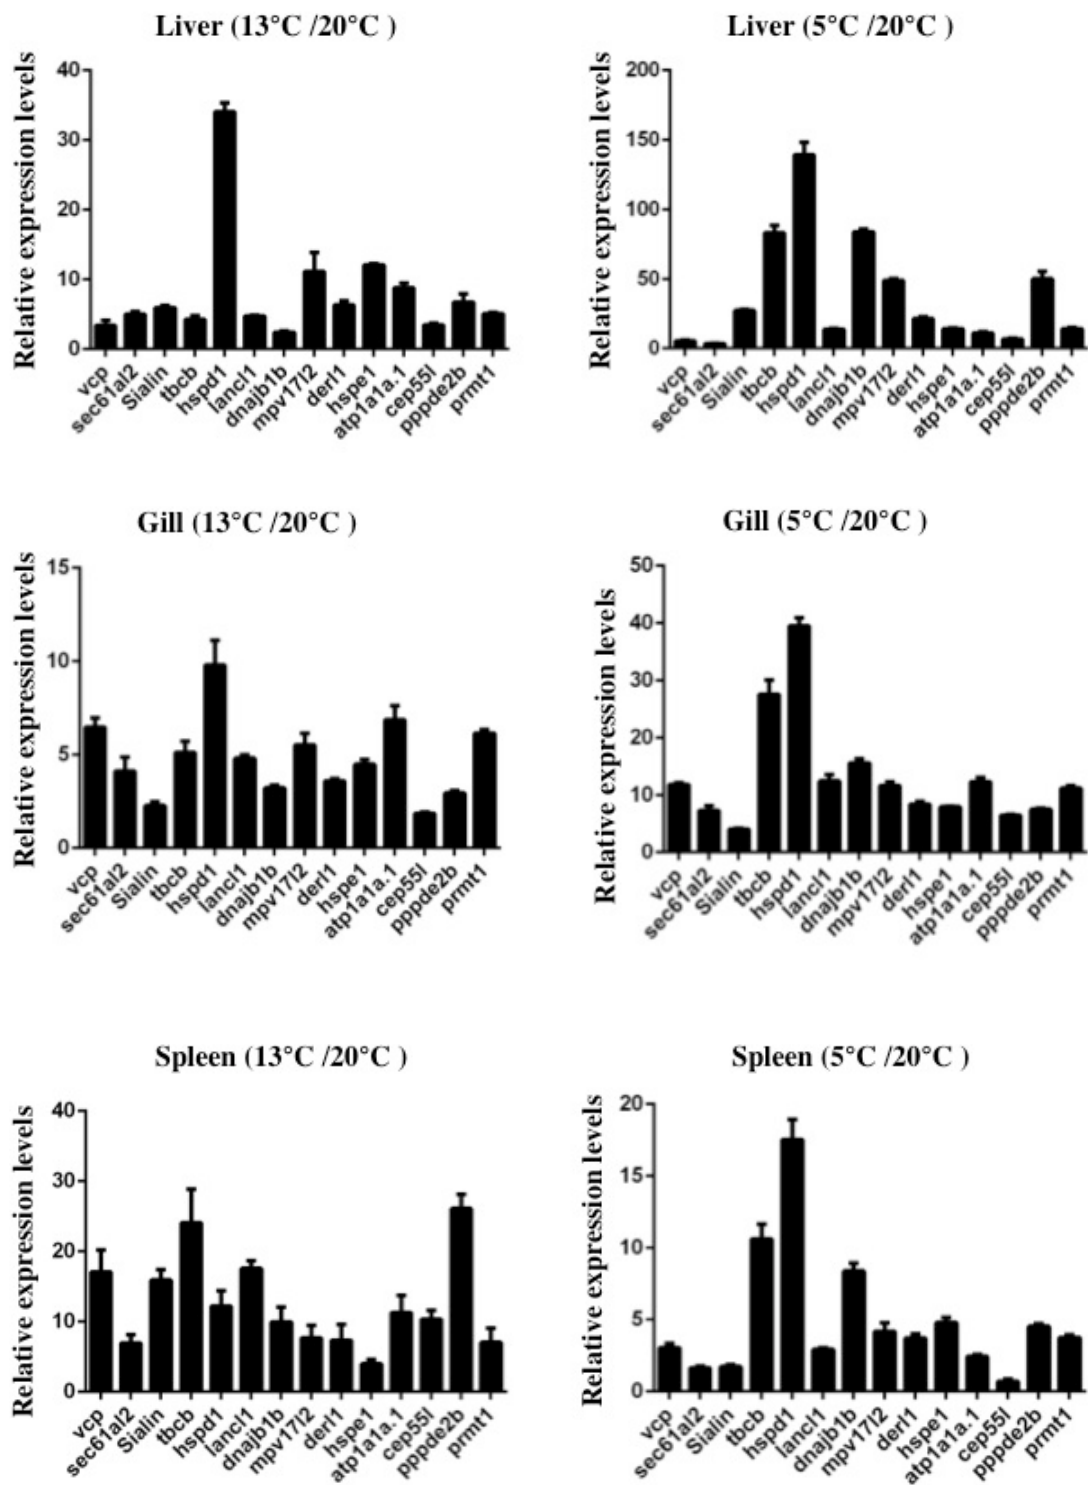

Supplement: pone.0130526.s001.pdf [file pone.0130526.s001.pdf]
